# Supplementary material for: High dielectric 3D scaffold to suppress Li-dendrites and increase the reversibility of anode-less Li-metal anodes
Source: Research Square preprint supplement (doi:10.21203/rs.3.rs-155161/v1), 2021-02-09
Supplement: Supplementary file 1 [file c41f55a064b25349df541509.docx]

Supporting Information

**High dielectric 3D scaffold to suppress Li-dendrites and increase the reversibility of Li-metal anodes**

Chao Wang1, Ming Liu1, Michel Thijs2, Frans G.B. Ooms1, Swapna Ganapathy1 and Marnix Wagemaker1*

1 Section Storage of Electrochemical Energy, Radiation Science and Technology, Faculty of Applied Sciences, Delft University of Technology. E-mail: m.wagemaker@tudelft.nl

2 Neutron & Positron Methods for Materials, Radiation Science and Technology,

Faculty of Applied Sciences, Delft University of Technology.


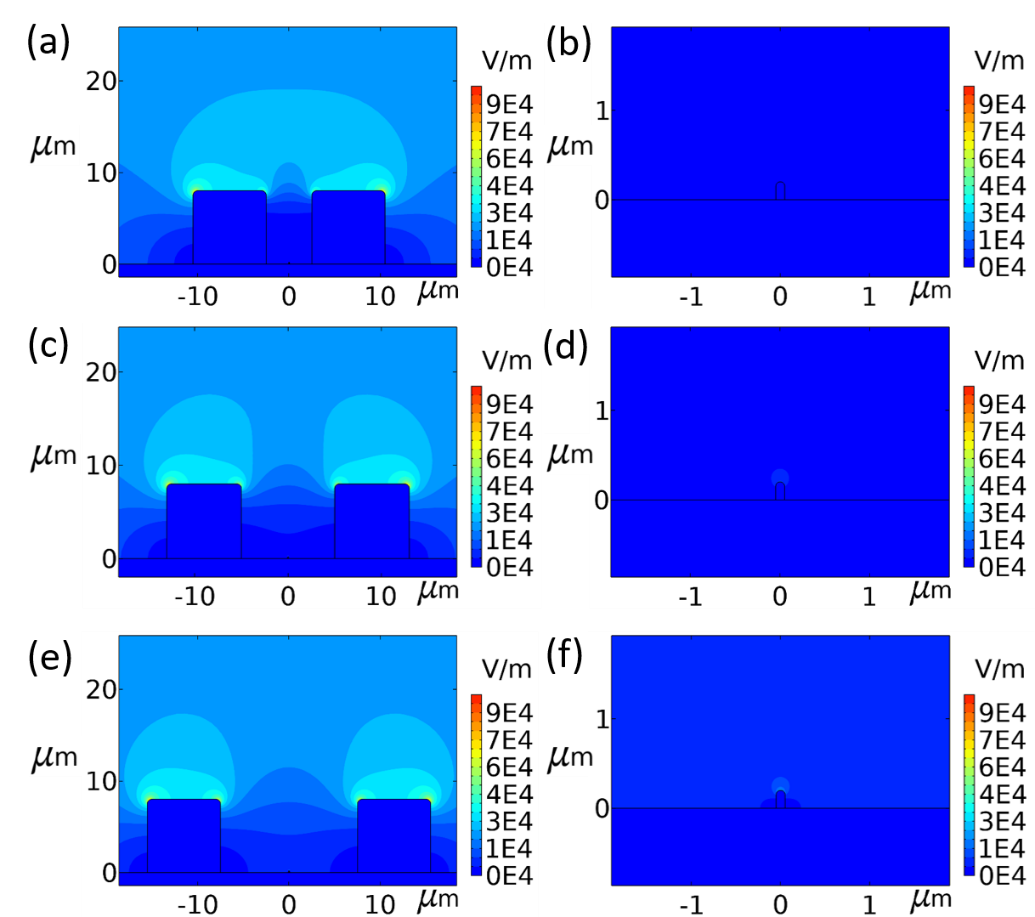


**Figure S1**  **Schematic diagram of the electric field distribution of BaTiO3 (BTO) coated Cu with different block gaps.** (a, b) with distance of 5 μm between blocks and zoomed-in figure, (c, d) with distance of 10 μm between blocks and zoomed-in figure, (e, f) with distance of 15 μm between blocks and zoomed-in figure.


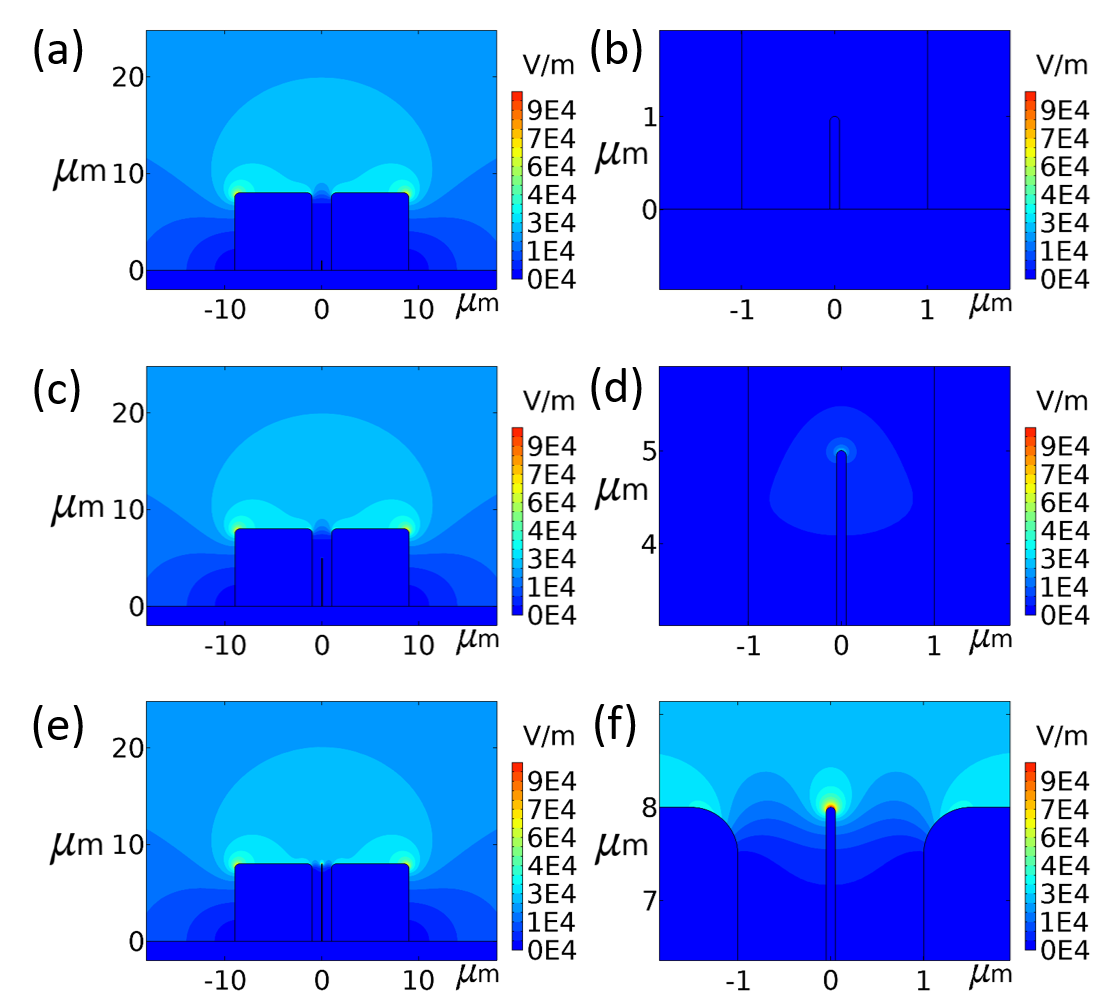


**Figure S2**  **Schematic diagram of the electric field distribution of BaTiO3 (BTO) coated Cu with different dendrite length.** (a, b) with a dendrite length of 1 μm and zoomed-in figure, (c, d) with a dendrite length of 5 μm and zoomed-in figure, (e, f) with a dendrite length of 8 μm and zoomed-in figure.


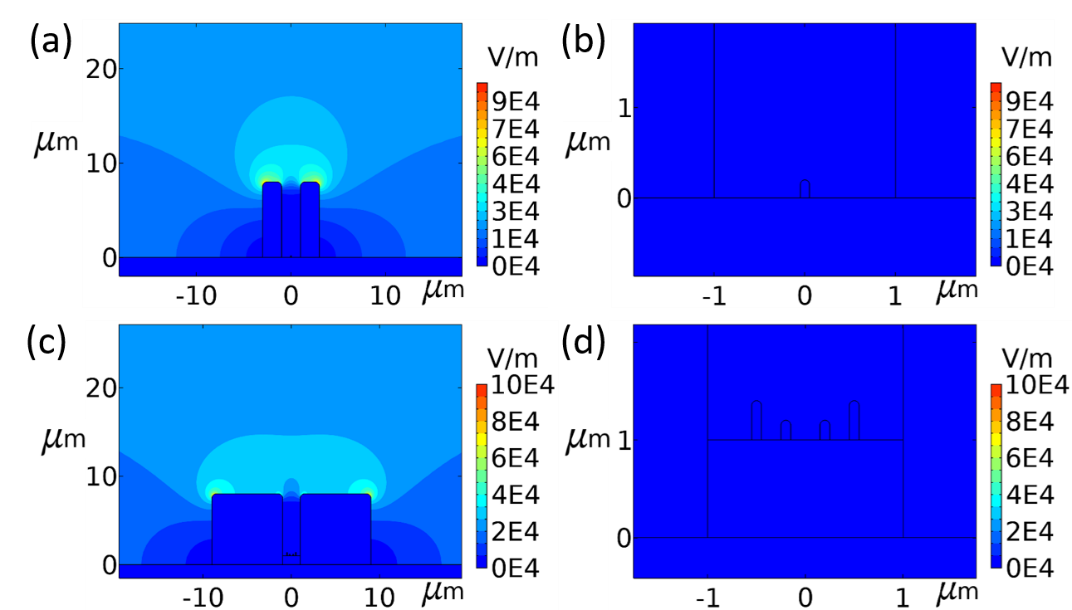


**Figure S3**  **Schematic diagram of the electric field distribution of BaTiO3 (BTO) coated Cu** (a, b) with a block width of 2 μm and zoomed-in figure, (c, d) with multiple dendrites and zoomed-in figure.


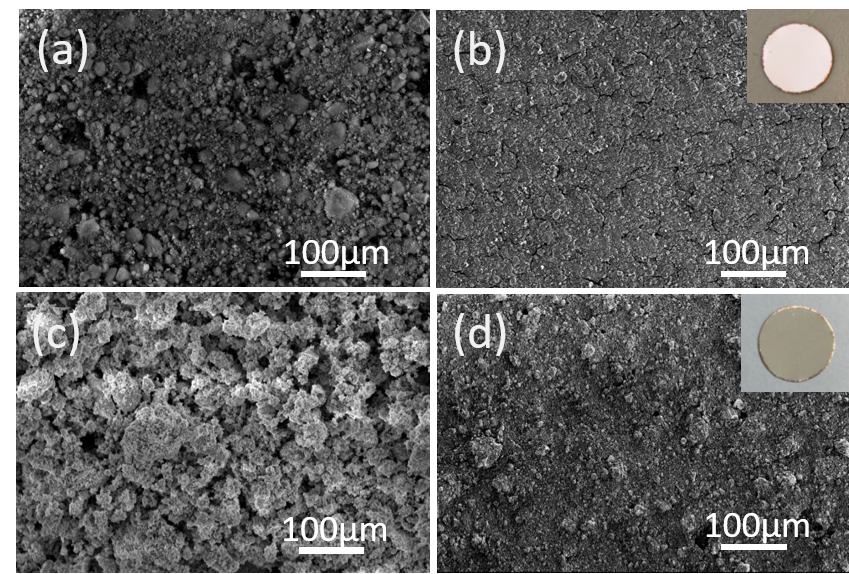


**Figure S4** **ball-milled starting materials and their coatings on copper.** (a, b) AO and AO coated on Cu,(c, d) BTO and BTO coated on Cu. Insets are the digital image of the electrode.


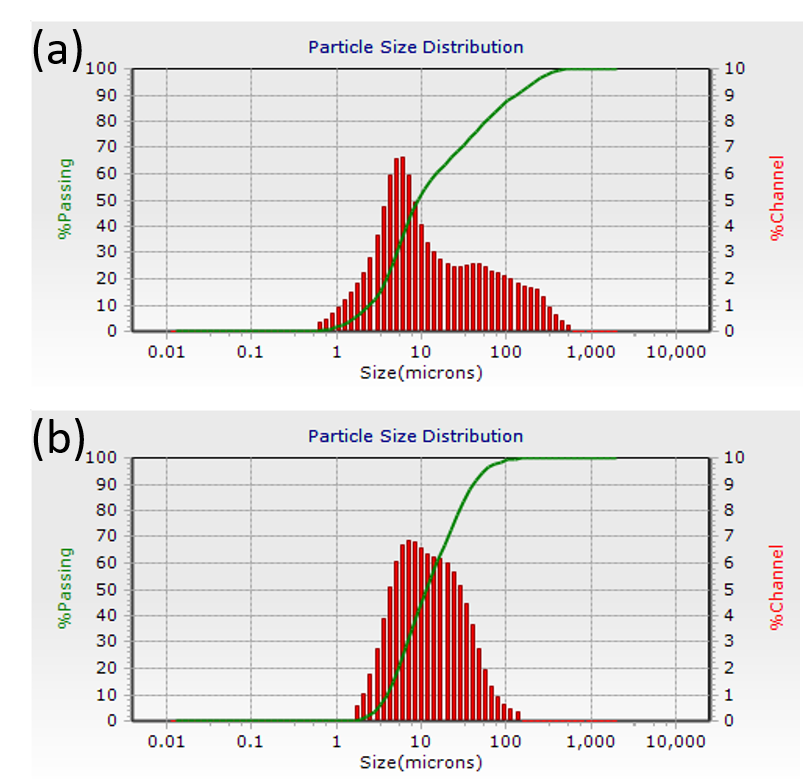


**Figure S5** Particle size distribution of (a) BTO and (b) AO as obtained using the Dynamic Light Scattering technique.





**Figure S6** Nitrogen adsorption/desorption isotherms at 77 K of BTO and AO materials.





**Figure S7** Static 7Li NMR spectrum measured with a wide spectral window of a fresh BTO-LCO battery.





**Figure S8**   Cyclic voltammetry performance of different electrodes with a scan rate of 1mV s‑1 in the range of -0.5 V to 3 V.





**Figure S9**   XRD patterns of BTO raw material and BTO electrodes before and after 1st and 100th cycles.


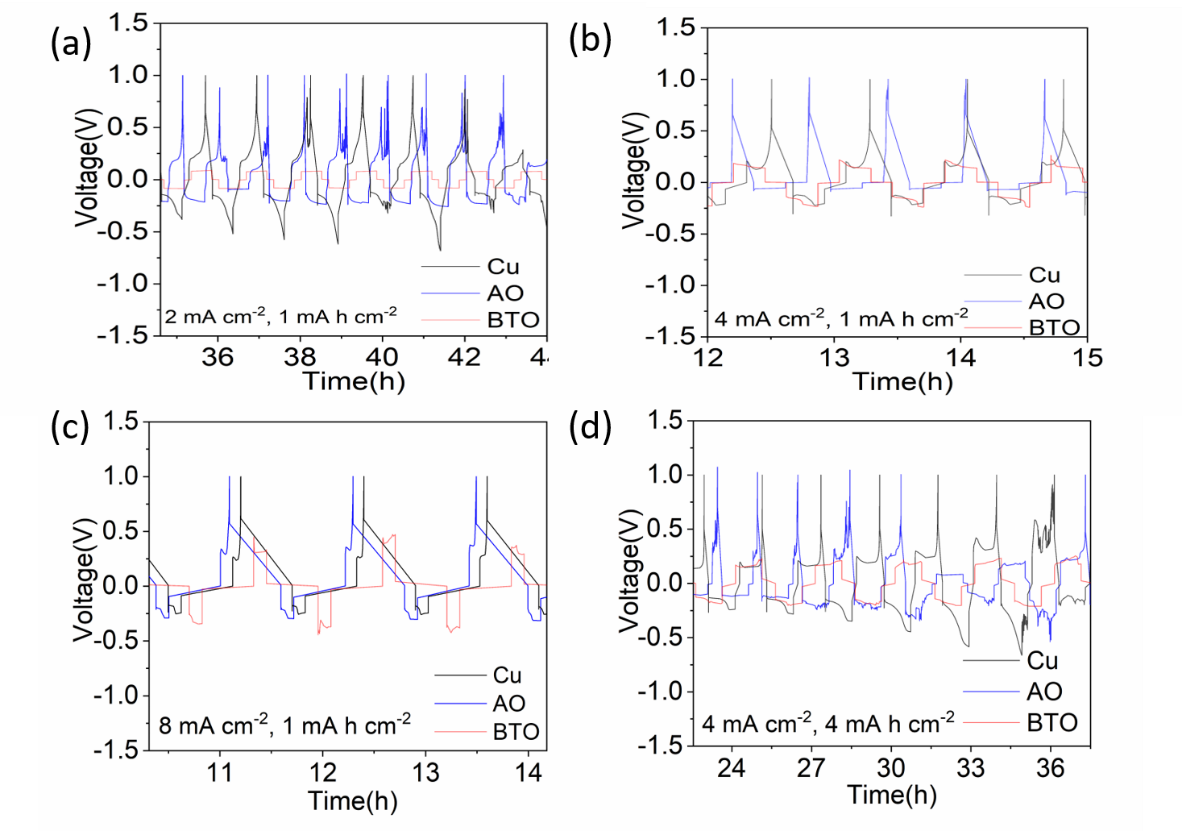


**Figure S10 Detailed voltage profiles of the anode-less Cu, AO and BTO scaffolds vs a Li-metal anode.** Evolution of the voltage during Li plating/stripping for the bare Cu and the AO and BTO scaffolds at different current densities (a) 2 mA cm-2, (b) 4 mA cm-2, (c) 8 mA cm-2 with a fixed areal capacity of 1 mA h cm-2, and (d) an increased areal capacity of 4 mA h cm-2 at a current density of 4 mA cm-2.


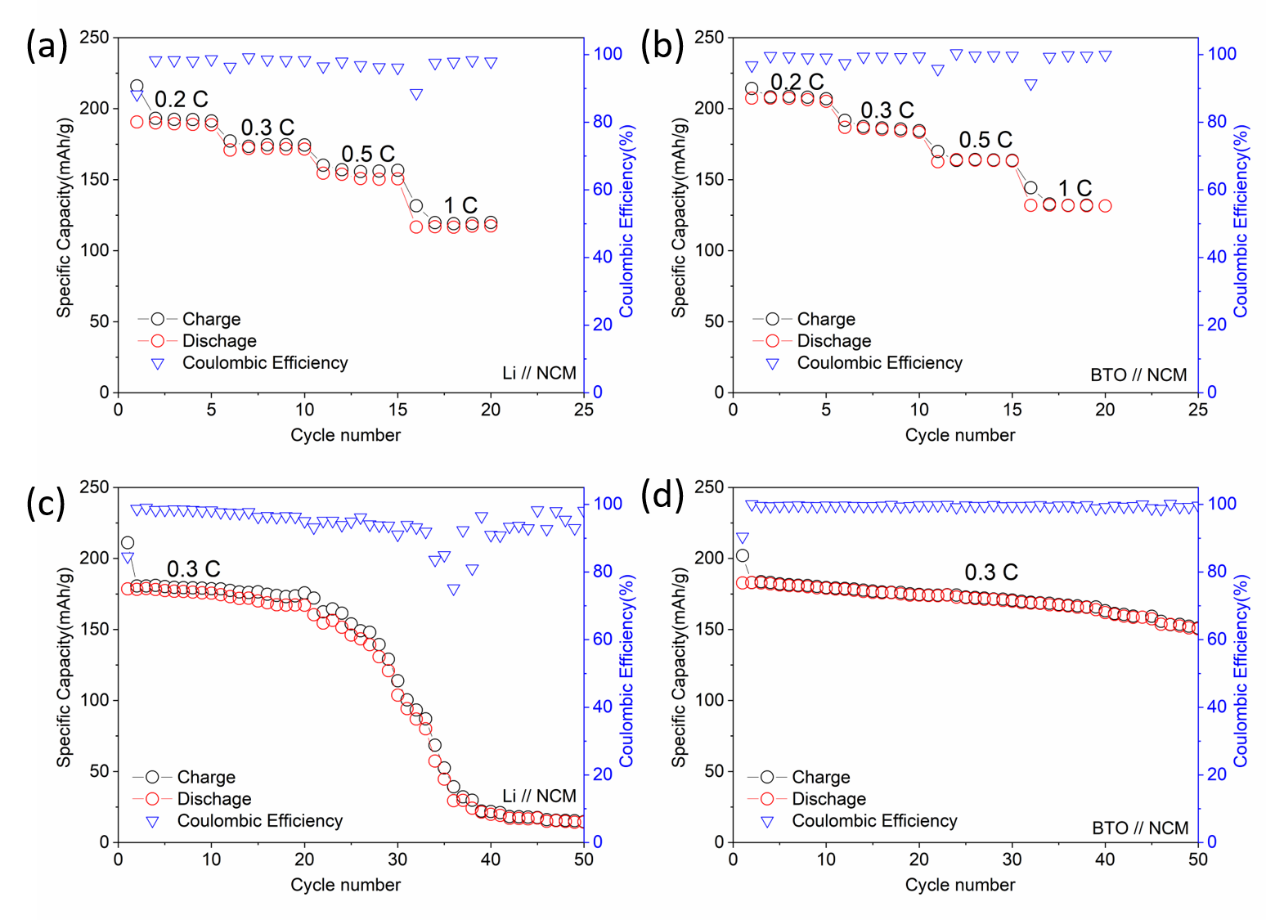


**Figure S11**   **Cycling performances and coulombic efficiency of Li-metal and BTO scaffold when paired with NCM cathode**.(a,b) Rate test from 0.2 C to 1 C. (c,d) Cycling test at 0.3 C.


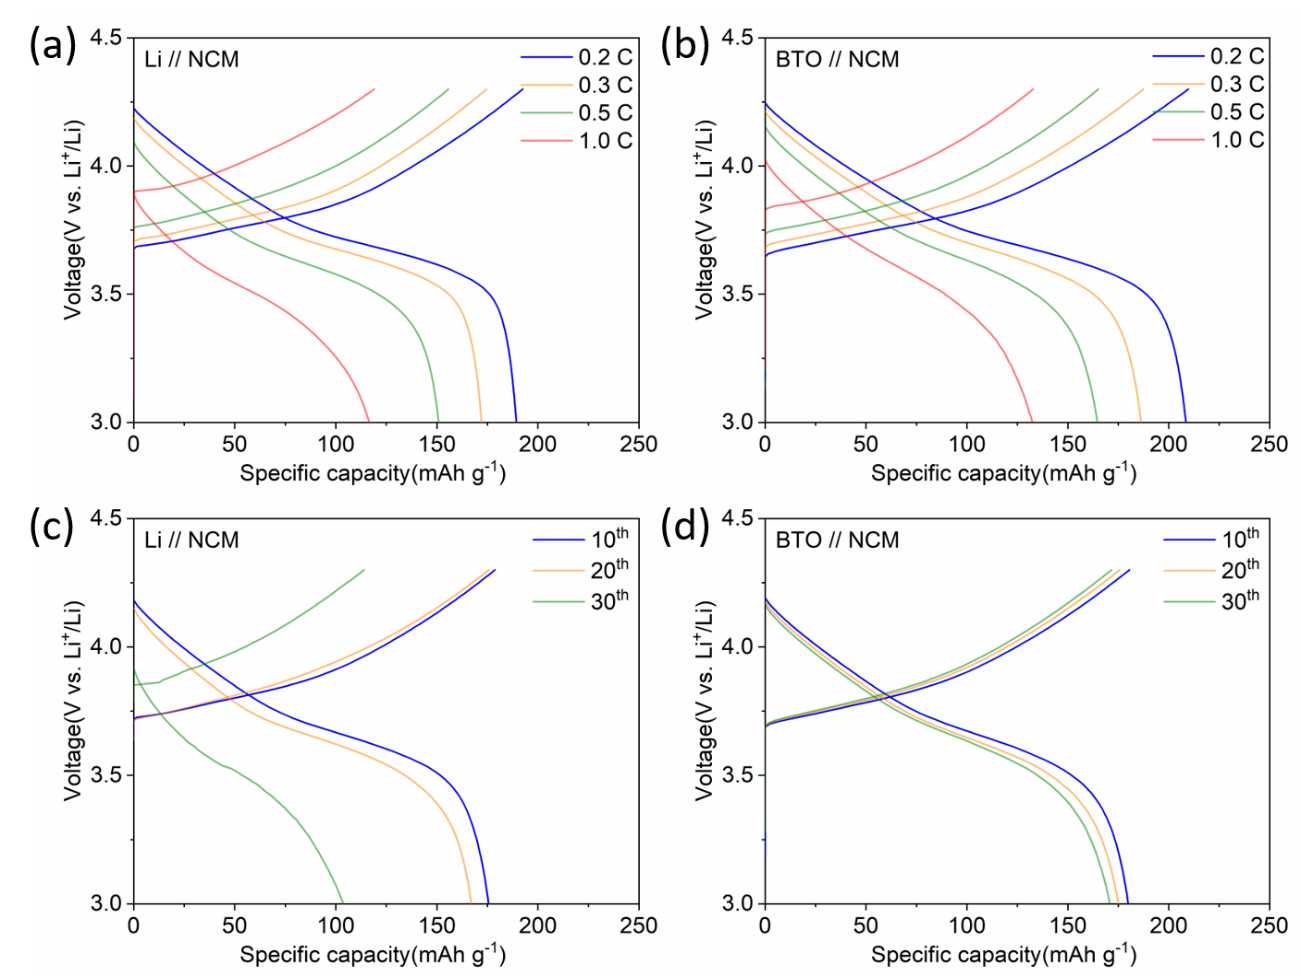


**Figure S12**   **Voltage profiles of Li-metal and BTO scaffold when paired with NCM cathode**.(a,b) Voltage profiles when cycled with different current densities. (c,d) Voltage profiles of different cycles when cycled at 0.3 C.


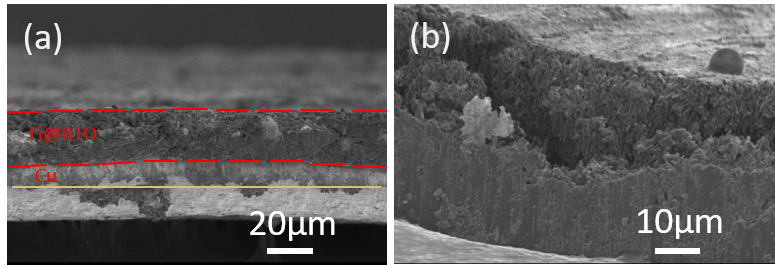


**Figure S13** Cross-section of BTO (a) and Cu (b) electrode after depositing 1 mA h cm‑2 Li-metal at a current density of 2 mA cm-2.
